# Supplementary material for: Implantable Brain-Computer Interface for Volitional Hand Grasp in Spinal Cord Injury
Source: Research Square preprint supplement (doi:10.21203/rs.3.rs-138657/v1), 2021-01-08
Supplement: Supplementary file 1 [file 6849222eecaf569e88f6bdf0.pdf]

# Supplementary Material

## Contents

|                                                                                  |    |
|----------------------------------------------------------------------------------|----|
| Pre-surgical Screening Protocol .....                                            | 2  |
| Surgical Study Timeline .....                                                    | 4  |
| Decoding upper extremity movement intent .....                                   | 4  |
| In-Laboratory ECoG Power Analysis.....                                           | 5  |
| In-Laboratory Channel Montage Selection .....                                    | 6  |
| In-Laboratory Feature Extraction and Supervised Learning Dataset Generation..... | 8  |
| Specific Classifier Parameters .....                                             | 9  |
| Functional tasks.....                                                            | 9  |
| Lower extremity closed-loop trials .....                                         | 10 |
| In-Laboratory Classifiers .....                                                  | 10 |
| Home Decoder Development .....                                                   | 12 |
| At-Home Feature Extraction .....                                                 | 13 |
| At-Home Decoder Architecture .....                                               | 14 |
| Hidden Markov Model decoder .....                                                | 14 |
| Linear Discriminant Analysis Decoder .....                                       | 16 |
| LDA-HMM Decoder.....                                                             | 16 |
| Lagged decoding .....                                                            | 17 |
| Cross-validation.....                                                            | 17 |
| Threshold setting.....                                                           | 18 |
| Artifact Detection .....                                                         | 18 |
| Functional Task Accuracy .....                                                   | 19 |
| Phone-based User Application Development.....                                    | 20 |
| Clinical Assessments .....                                                       | 23 |
| References .....                                                                 | 27 |

## Pre-surgical Screening Protocol

Briefly, individuals with C5 quadriplegia who called or visited The Miami Project to Cure Paralysis or who had registered with the research center with an interest to participate in research were offered the opportunity to participate in this screening study.

Each participant underwent screening measurements and testing during a 1-3-month evaluation period (depending schedule and availability). A total of up to 16 sessions were required for subjects to be considered for the surgical protocol. During each session the ability of the subject to reliably trigger electrical stimulation of the hand using motor imagery was tested. A subset of the results comparing the performance of healthy volunteers and SCI subjects has been separately published<sup>1</sup>. Upon completing these tests, the subject underwent a brain fMRI study to characterize the ability of motor imagery related to hand movement to lead to changes in the BOLD signal.

---

**TABLE S1 SURGICAL PROTOCOL MAJOR INCLUSION CRITERIA**

| Inclusion Criteria                      | Measure                                | Rationale                                                                                           |
|-----------------------------------------|----------------------------------------|-----------------------------------------------------------------------------------------------------|
| Age $\geq$ 22                           | Years of age                           | Higher rates of neurological recovery in adults and better potential for rehabilitation             |
| Age $\leq$ 50                           | Years of age                           | Lower risk of complications                                                                         |
| AIS Grades A & B                        | Neurological exam                      | Standard neurologic assessment for spinal cord injury                                               |
| Level of injury<br>C5 motor<br>complete | Neurological exam                      | The appropriate injury level for measuring detectable restoration of both triceps and hand function |
| Local<br>community<br>dwelling          | Proof of local<br>community<br>address | Higher compliance to weekly follow-up visits                                                        |

|                                            |                                                                        |                                                                                                                                       |
|--------------------------------------------|------------------------------------------------------------------------|---------------------------------------------------------------------------------------------------------------------------------------|
| Stable chronic injury                      | 1-15 years post injury                                                 | Suitability for efficacy measurements while excluding complications that develop with excessive time post-injury                      |
| Stable health status and upper extremities | No significant joint contractures at the elbow, wrists, or hands       | Minimize interferences with the ability to perform outcome measure tests like transfer or pinch                                       |
| Participation in Clinical EEG Protocol     | Successful screening and assessments outlined in Clinical EEG Protocol | Selection of candidates screened in Clinical EEG Protocol ensures participants possess ability to trigger orthosis with motor imagery |

44

45 **TABLE S2 SURGICAL PROTOCOL MAJOR EXCLUSION CRITERIA**

| Exclusion Criteria | Measure                       | Rationale                              |
|--------------------|-------------------------------|----------------------------------------|
| Coagulopathy       | Lab test                      | Higher risks of complications          |
| Anticoagulation    | Lab test                      | Higher risks of surgical complications |
| Pregnancy          | Urine or serum pregnancy test | Risk to fetus                          |

46

47 **Additional Exclusion Criteria**

- 48 1. Subjects with severe non-CNS injury or serious concurrent medical issues.
- 49 2. Subjects with metal prosthetics.
- 50 3. Subjects with tendon transfers.
- 51 4. Subjects with a history of cardiac arrhythmia.
- 52 5. Subjects with cognitive issues. During Screening, subjects will undergo a
- 53 Neuropsychological testing and use the Mini-Mental Status has a guide to severity of
- 54 dementia. A MMSE score of  $\leq 15$  will be an absolute exclusion. Anything above that
- 55 score but still abnormal will be a relative contraindication requiring discussion amongst
- 56 the research team.
- 57 6. Subjects who have made a suicide attempt or are severely depressed. Severe
- 58 depression should be defined based on a depression assessment scale.
- 59 7. Subjects with peripheral nerve damage that will affect planned investigational testing will
- 60 be excluded.
- 61 8. Subjects with medical condition that requires regular post-implant MRIs.
- 62 9. Subjects who suffer from claustrophobia (contraindication for fMRI).
- 63 10. Subjects who have a life expectancy of less than 2 years.

11. Subjects diagnosed with peripheral polyneuropathy.
12. Subjects with another implanted stimulator (e.g., pacemaker, defibrillator, cochlear implant, neurostimulator, etc.)
13. Subjects who have been, or are currently, enrolled in another investigational study.
14. Subjects who have skin ulcerations, a history of poor wound healing, an active infection, or significant pain in the lower extremity that is being treated.
15. Subjects unable to give informed consent.
16. Subjects who are prisoners or wards of the state.
17. Subjects who are pregnant or planning to become pregnant.
18. Subjects that speak languages without local site level expertise for translation and verbal communication.
19. Screening Study Specific Exclusion
  - a. fMRI does not show reproducible hand/arm activation
  - b. External triceps stimulation does not produce consistent, adequate, and reproducible contraction
  - c. EEG BCI studies do not lead to viable control

## Surgical Study Timeline

The presented subject was enrolled in the study on November 2, 2018 and surgical implantation occurred on November 30, 2018. A timeline of the important study events is given Figure S1.

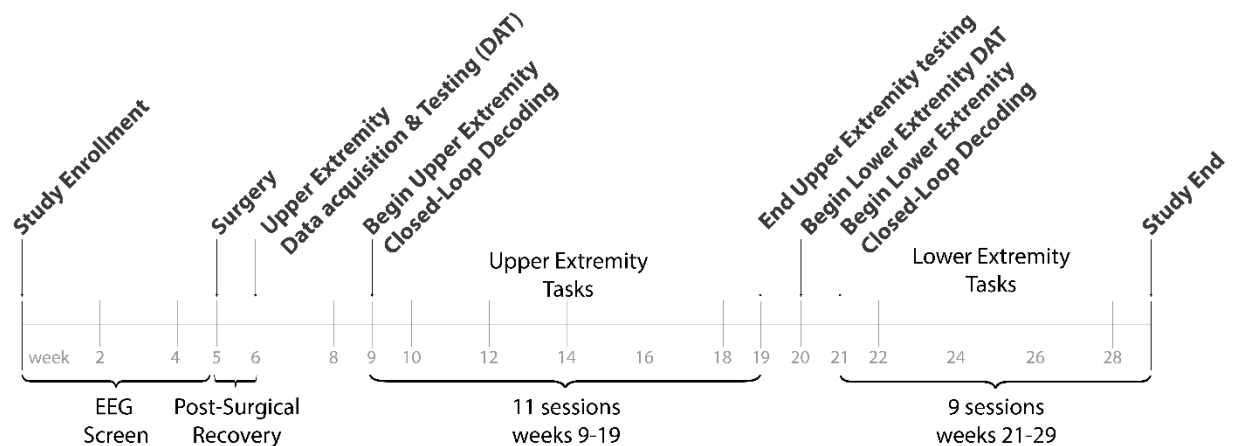

**FIGURE S1 STUDY TIMELINE. DAY 0 OF THE STUDY BEGINS ON THE DATE THE SUBJECT SIGNED INFORMED CONSENT TO BEGIN THE SCREENING PROTOCOL WITH EEG.**

## Decoding upper extremity movement intent

After surgical recovery, the subject came to the laboratory 2-3 times per week for 1-2 hours at a time. A timeline of the 29-week trial is included in the Supplementary methods (Figure S1). During the duration of the study, the subject participated in 121 upper extremity experimental sessions, with an average of 11 sessions per week (range 5-12). Each session consisted of 100 trials during

which the subject was asked to perform motor imagery of continuous movement of the dominant right hand. The 100 trials were completed in blocks of 20 trials with several minutes of rest in between so that subject does not become fatigued. During the motor imagery tasks, the subject was instructed to think of relaxing his hand for 3 seconds, followed by thinking continuously of moving the right hand for 3 seconds during which time the ECoG activity was recorded (Figure **1C** and **D**). During study weeks 6-8, “open-loop” experiments were run where the subject was asked to perform move or rest motor imagery, but FES was not applied to the hand. Offline analysis included calculating average band power within pre-defined frequency bins (see Supplementary methods) during the “rest” and “move” periods, that were used as features for training various classifiers (bagged trees, k-nearest neighbors, linear discriminant, logistic regression, linear support vector machine, and a neural network). The purpose of training and testing various classification algorithms was to use the one which gave highest decoding accuracy and consistency, to be used for online closed-loop experiments.

## In-Laboratory ECoG Power Analysis

The Activa PC+S device was configured with the following montage such that the ECoG data from channels 1 and 3 (time channels) was sampled at 200Hz, whereas channels 2 and 4 (power channels) were configured for onboard computation of the average signal power between 4-36Hz and sampled at 5Hz (see Table S3). Data from the implanted device was transmitted via the antennae to an external laptop running Matlab 2015b. Data packets were received every 400ms. For each trial, all the packets from the “rest” or “move” phase were collected to yield 3 seconds of data for each phase. The power content of both time channels for each separate experiment phase was estimated using the pspectrum function in Matlab. The frequencies were binned into 8 pre-specified segments based on typical frequency ranges commonly used to describe EEG/ECoG as: 1-8Hz, 8-12Hz, 12-18Hz, 18-26Hz, 26-35Hz, 35-45Hz, 45-70Hz, and 70-100Hz. The average signal power within each bin was computed for each of the time channels and

together with the onboard -computed power channel values used to create an 18-dimensional feature vector for each experimental phase.

**TABLE S3**

| Channel Number | Electrode Configuration | Sample Rate (Hz) | Output Type                                   |
|----------------|-------------------------|------------------|-----------------------------------------------|
| 1              | E0-E3                   | 200              | Raw Channel 1 Signal                          |
| 2              | E1-E2                   | 5                | Avg. Power in Channel 2 Signal between 4-36Hz |
| 3              | E8-E10                  | 200              | Raw Channel 3 Signal                          |
| 4              | E9-E11                  | 5                | Avg. Power in Channel 4 Signal between 4-36Hz |

For channels 1 and 3, the average power in 8 pre-defined frequency ranges were used as features, whereas for channels 2 and 4 the average power between 4Hz and 36Hz yielded two additional features (Figure S3). All 18 (8 features per channel x 2 channels + 1 feature per power channel x 2 power channels) values were used as a feature vector for classifier training. Additionally, during study weeks 6-8, all bipolar combinations of the surface contacts were tested with this paradigm to determine the montage that yielded the highest power difference between rest and move signals (Figure S2). The final electrode montage is summarized in Figure 1B. It was determined that the best performing classifier was the bagged tree classifier which was therefore chosen for online decoding for the remainder of in-laboratory experiments from weeks 9-29.

## In-Laboratory Channel Montage Selection

“Open-loop” tasks which consisted of the subject performing only motor imagery of either hand rest or movement were then run with each possible electrode montage configuration and the integrated absolute difference in signal power between the rest ( $P_{Rest}$  and move ( $P_{Move}$ ) phases computed in each frequency bin of interest. These trials were used to determine the electrode montage that allowed for the best discrimination between the “rest” and “move” states. As shown

in Figure S2, the configuration E0-E3 for channel 1 and E8-10 for channel 3 resulted in the largest power differences between the “rest” and “move” states and were therefore used for the remainder of the experiments.

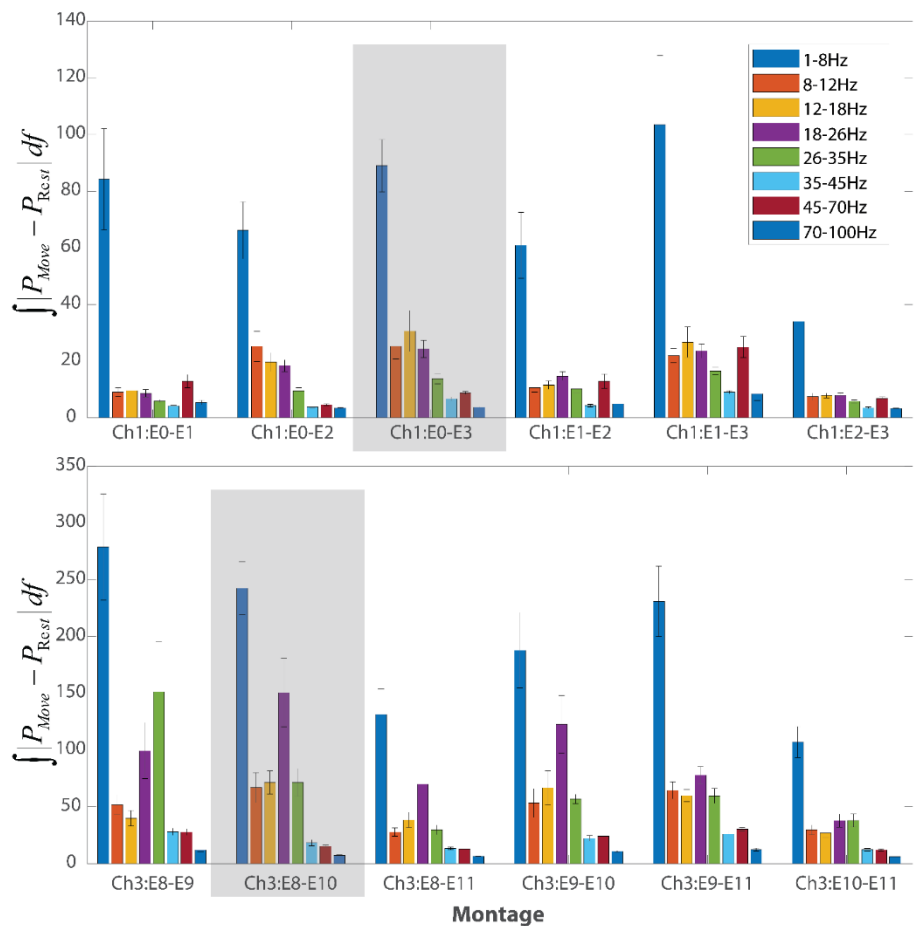

**FIGURE S2 CHANNEL MONTAGE COMPARISONS. THE POWER DIFFERENCES BETWEEN THE MOVE AND REST STATES WERE INTEGRATED WITHIN A SET OF FREQUENCY BANDS LISTED IN THE LEGEND. THE MONTAGE CONFIGURATIONS HIGHLIGHTED IN GRAY WERE CHOSEN DUE TO THE ABILITY TO CAPTURE THE HIGHEST DIFFERENCES IN THE BETA BAND (18-26Hz) AND LOW GAMMA (26-35Hz).**

From study weeks 9-19, “closed-loop” upper extremity experiments were conducted where the decoded motor imagery state from the online classifier was used to drive FES of the right upper extremity via an external orthosis (Bioness H200, Bioness, Valencia, CA). For these experiments, each session consisted of blocks of 20 trials. On session 1 of week 9, the first block was performed in “open loop” and used to train the online classifier for use in session 2. Subsequent sessions in closed loop were run with a classifier trained using the previous 1-5 blocks until maximum of 5

prior blocks were available for training; all subsequent blocks used the online classifier obtained from training with the prior 5 blocks of data. Figure **1D** shows average spectrograms for rest and move motor imagery across all closed-loop sessions with the final selected electrode montage which is shown in Figure **1B**.

## In-Laboratory Feature Extraction and Supervised Learning Dataset Generation

Figure S3 Panel A shows a sample ECoG channel,  $E(t)$ , during REST (R) and MOVE (M) states during trial  $j$ . For channels 1 and 3, the power spectrum of the signals is estimated based on approximately 3 seconds worth of data for each continuous time channel sampled at 200 Hz using the pspectrum function. The average power in each bin is computed yielding 8 features for each time channel,  $ch = 1,3$ , and movement condition,  $c_j$ , and saved as the feature vectors  $f_{ch}^{c_j}$ . For Channels 2 and 4, the average power in a frequency bin centered at 20 Hz with a bin width of 16Hz (4-36Hz) is computed online within the PC+S and output from the device at a sample rate of 5Hz. The average power from Channels 2 and 4 for condition,  $c_j$ , ( $f_2^{c_j}$  and  $f_4^{c_j}$  respectively) are then added as additional features to those computed from Channels 1 and 3 to produce a 18-dimensional feature vector  $f^{c_j} = [f_1^{c_j}, f_2^{c_j}, f_3^{c_j}, f_4^{c_j}]$  Panel B shows how for each trial  $j$  and condition,  $c_j$ , spectral features are extracted and used to construct a training set that could be used to select among different types of classifiers.



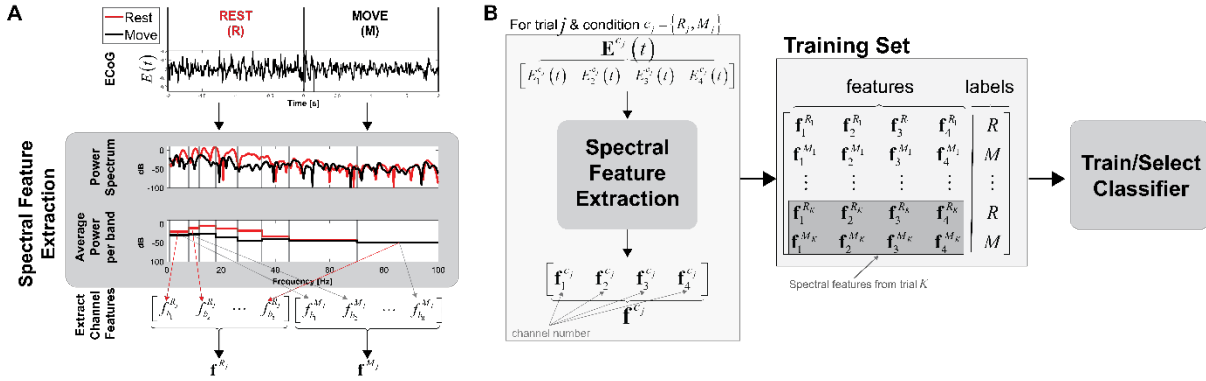

**FIGURE S3 FEATURE EXTRACTION AND CLASSIFIER TRAINING DATASET.** PANEL A SHOWS A SAMPLE ECoG CHANNEL,  $E(t)$ , DURING REST (R) AND MOVE (M) STATES DURING TRIAL  $j$ . FOR CHANNELS 1 AND 3, THE POWER SPECTRUM OF THE SIGNALS WAS ESTIMATED BASED ON APPROXIMATELY 3 SECONDS WORTH OF DATA FOR EACH CONTINUOUS TIME CHANNEL SAMPLED AT 200 HZ. THE AVERAGE POWER IN EACH BIN WAS COMPUTED YIELDING 8 FEATURES FOR EACH TIME CHANNEL,  $ch = 1, 3$ , AND MOVEMENT CONDITION,  $c_j$ , AND SAVED AS THE FEATURE VECTORS  $f^{c_j}_{ch}$ . FOR CHANNELS 2 AND 4, THE AVERAGE POWER IN A FREQUENCY BIN CENTERED AT 20 HZ WITH A BIN WIDTH OF 16Hz (4-36Hz) WAS COMPUTED ONLINE WITHIN THE PC+S AND OUTPUT FROM THE DEVICE AT A SAMPLE RATE OF 5Hz. THE AVERAGE POWER FROM CHANNELS 2 AND 4 FOR CONDITION,  $c_j$ , ( $f^{c_j}_2$  AND  $f^{c_j}_4$  RESPECTIVELY) WERE THEN ADDED AS ADDITIONAL FEATURES TO THOSE COMPUTED FROM CHANNELS 1 AND 3 TO PRODUCE A 18-DIMENSIONAL FEATURE VECTOR  $f^{c_j}$ . PANEL B SHOWS HOW FOR EACH TRIAL AND CONDITION, SPECTRAL FEATURES WERE EXTRACTED AND USED TO CONSTRUCT A TRAINING SET THAT WAS USED TO SELECT AMONG DIFFERENT TYPES OF CLASSIFIERS.

## Specific Classifier Parameters

All classifiers were trained in Matlab 2018b but online experiments were conducted in 2015a.

Off-line classifiers were selected as outlined in Table S4

## Functional tasks

From weeks 11-19, several tasks were performed alongside the upper extremity trials to quantify any improvements in upper extremity function. Starting on week 11, whenever a correct move state was decoded and the subject was receiving FES to open and close the hand, he was asked to pick up and move a small cup (or a checker introduced from week 13) from one side of the table to the other at the center of a target. The placement accuracy was measured as a function of the distance of the cup/checker to the target. Additionally, during weeks 8-29 a modified version of the Jebsen-Taylor Hand Function Test (JHFT)<sup>23</sup> was performed once per week to quantify functional improvement. Passive and active range of motion was also measured each week.

## Lower extremity closed-loop trials

In order to assess the ability of this class of implant to be used to control other functional movements, we sought to test the ability to trigger stepping instead of upper extremity FES. Beginning on study week 14, the subject underwent tilt table training for 1 hour per week to assist with maintaining a standing posture without significant orthostatic hypotension. Beginning on study week 20, the subject began to participate in lower extremity tasks consisting of ambulating for one hour on a robotic-assisted weight supported treadmill training device (ReoAmbulator, Motorika, Mount Laurel, NJ) 1-3 times per week. During each session, the subject would try to participate in 50 trials (with 10 trials per block). Each session was structured similarly to the upper extremity session. For each trial, the robot was configured to walk at a speed of 0.6-1.7 km per hour for 4-6 gait cycles and then stop. As the robot was slowing down, a visual cue would prompt the subject to think about moving the dominant upper extremity. If a move state was correctly decoded, the robot would be triggered to resume stepping for an additional 4-6 gait cycles (Video S1). Closed-loop lower extremity trials were conducted from study weeks 21-29.

## In-Laboratory Classifiers

Figure **2A** summarizes decoding performance across all upper extremity sessions (open-loop and closed loop) for weeks 9-19 for different classifier types. For offline analysis of the closed loop experiments, a total of 80-240 trials were used with half of the data set used for training and the other half for testing. The accuracies presented represent the average of 100 monte-carlo simulations. Mean online decoding accuracy per week was 89.0% (median 88.75%, range 78-93.3%) which was not significantly different from offline performance across the 5 types of classifiers tested (Kruskal-Wallis test with Tukey-Kramer adjustment for multiple comparisons,  $p>0.06$ ). Online decoding during weeks 9-19 remained relatively stable for upper extremity tasks across weeks as shown in Panel **2B**. Figure **S4C** summarizes decoding performance across all lower extremity gait tasks for weeks 21-29 across different classifier types. Mean online decoding accuracy per week for the lower extremity tasks was 84.15% (median 85%, range 73.3-90%).

There was no significant difference between online decoding accuracies on upper versus lower extremity tasks (two-tailed t-test,  $p = 0.13$ ).

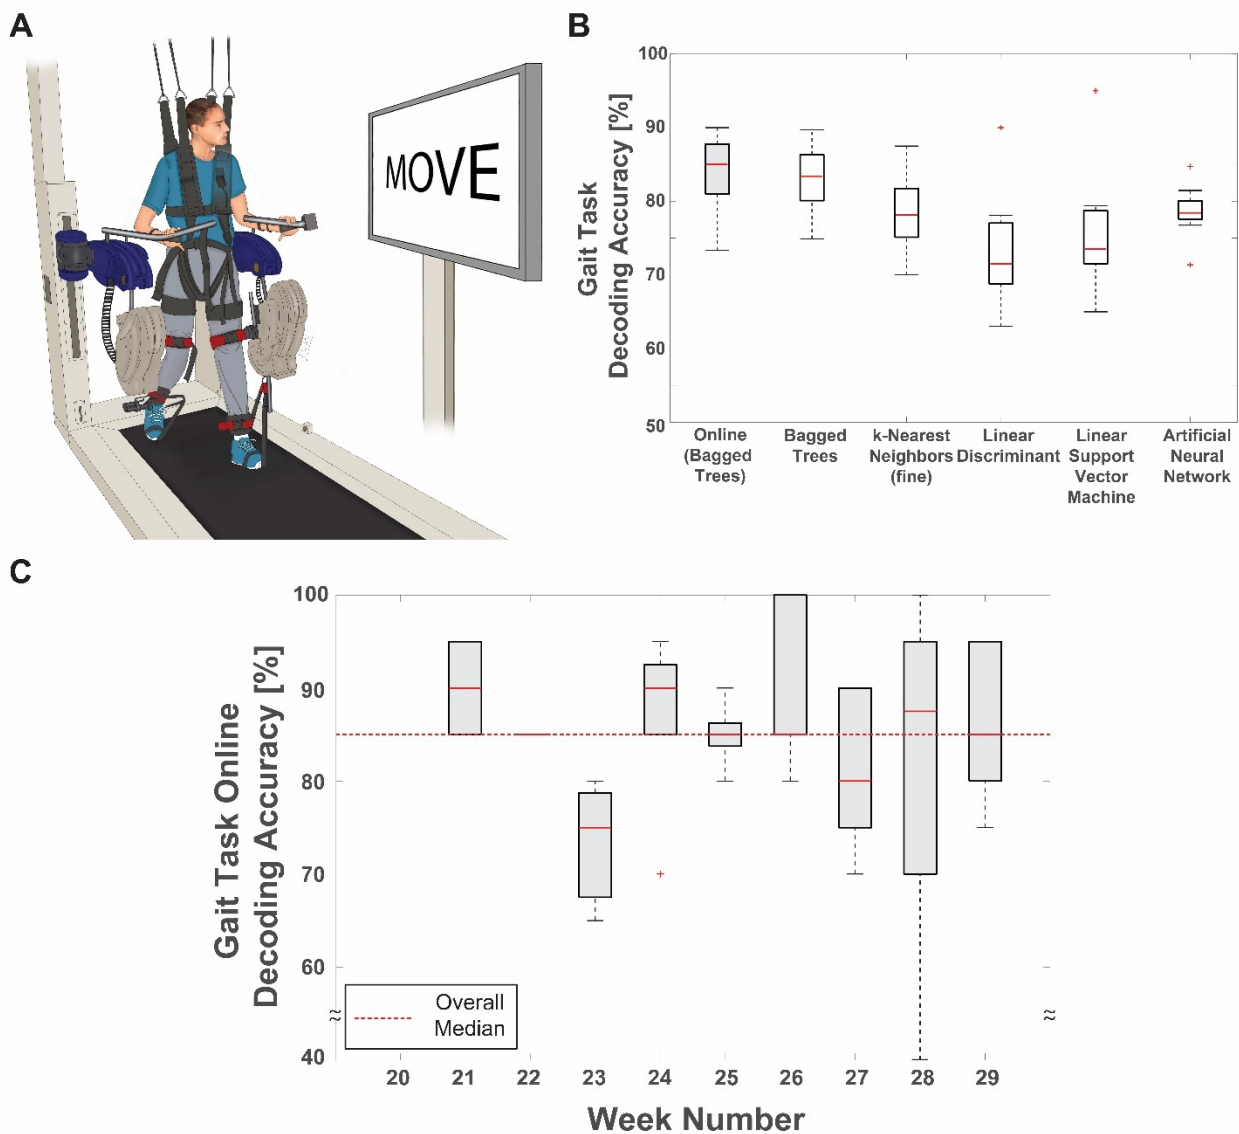

**FIGURE S4 LOWER EXTREMITY DECODING PERFORMANCE.** PANEL A SHOWS THE LOWER EXTREMITY AMBULATION TASK WHICH WAS PERFORMED ON A WEIGHT-SUPPORTED TREADMILL TRAINING DEVICE. WHEN A MOVE STATE WAS CORRECTLY DECODED, THE ROBOT WAS ENABLED TO CONTINUE WALKING FOR A FIXED NUMBER OF STEPS. PANEL B SHOWS THE DIFFERENT TYPES OF CLASSIFIERS TO DECODE REST/MOVE DURING THE GAIT TASK. PANEL C SHOWS THE ONLINE DECODING ACCURACY DURING THE GAIT TASK ACROSS STUDY WEEKS. ONLINE DECODING ACCURACY DURING LOWER EXTREMITY TASKS WAS SLIGHTLY MORE SENSITIVE TO SUBJECT'S ATTENTION AND THIS IS REFLECTED IN THE SLIGHTLY INCREASED VARIABILITY OF DECODING ACCURACY DURING THESE TASKS COMPARED TO THE UPPER EXTREMITY ONES.

**TABLE S4 – CLASSIFIER PARAMETERS**

| Classifier Name                                 | Matlab Function      | Parameters                                                                                             |
|-------------------------------------------------|----------------------|--------------------------------------------------------------------------------------------------------|
| ensemble Bagged Trees                           | fitcensemble         | MaxNumSplits=79; Method='Bag'; NumLearningCycles=30;                                                   |
| K nearest neighbor (kNN)                        | fitcknn              | Distance='Euclidean', Exponent=[]; NumNeighbors=1; DistanceWeight='Equal'; Standardize='true'          |
| linear discriminant analysis (LDA)              | fitcdiscr            | DiscrimType='linear'; Gamma=0; FillCoeffs='off';                                                       |
| support vector machine (SVM)                    | fitcsvm              | KernelFunction='linear'; PolynomialOrder=[]; KernelScale='auto'; BoxConstraint=1; 'Standardize' = true |
| fully connected artificial neural network (ANN) | learnNN <sup>2</sup> | NumberHiddenLayers=3; ActivationFunction=tanh                                                          |

## Home Decoder Development

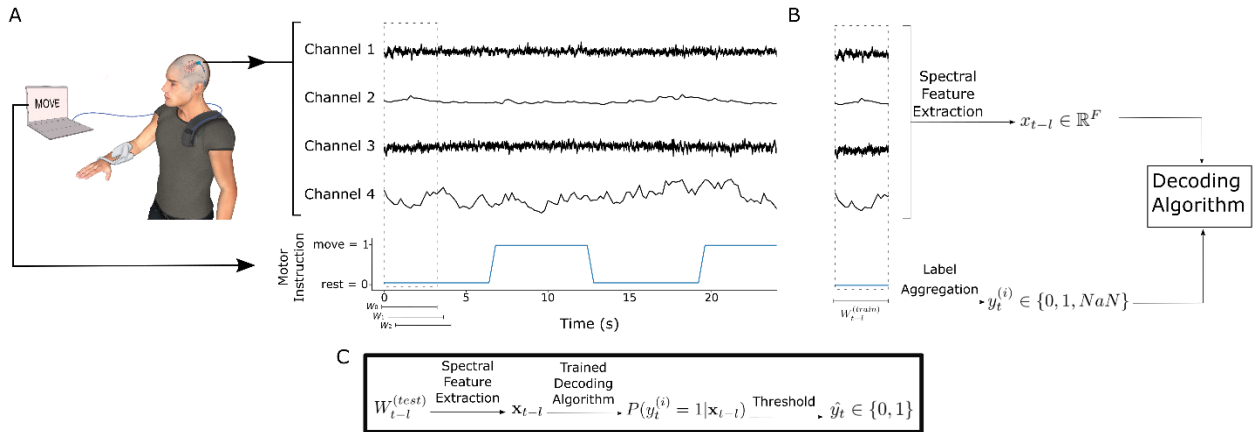

**FIGURE S5 AT-HOME DECODER METHODS.** PANEL A SHOWS THE RAW DATA RECORDED WITH THE DOTTED BOX REPRESENTING ONE WINDOW OF DATA. OVERLAPPING WINDOWS  $w_0, w_1, w_2$  ARE SHOWN AT THE BOTTOM WHERE EACH WINDOW WAS  $w$  SECONDS LONG WITH A WINDOW STEP OF 0.4 SECONDS. MOTOR INSTRUCTION WAS USED AS LABELS FOR DECODER TRAINING. PANEL B SHOWS THE PREPROCESSING OF THE DATA. SPECTRAL FEATURES FROM ALL FOUR CHANNELS WERE COMPUTED AND CONCATENATED, RESULTING IN FEATURE VECTOR  $\mathbf{x}_{t-l}$  FOR WINDOW  $w_t$  WHERE  $t$  IS THE TIME AT THE END OF THE WINDOW AND  $l$  IS THE LAG HYPER-PARAMETER. MOTOR INSTRUCTION LABELS OVER THE WINDOW WERE AGGREGATED USING METHOD  $i$ . THE RESULTING FEATURE VECTOR  $\mathbf{x}_{t-l}$  AND LABEL  $y_t^{(i)}$  WERE COMPUTED FOR ALL WINDOWS  $w_t$  IN THE TRAINING SET WERE USED TO TRAIN THE DECODING ALGORITHM. HYPER-PARAMETERS  $\{w, l, i, \text{decoding algorithm}\}$  WERE SELECTED VIA CROSS-VALIDATION (TABLE S5). PANEL C SHOWS A FLOW DIAGRAM OF ONLINE DECODING OF MOTOR STATE AS APPLIED TO THE OPEN-LOOP AND CLOSED-LOOP AT-HOME DATA.

## 249 At-Home Feature Extraction

250 Feature extraction and decoder development hyper-parameters were selected by leave-one-out  
 251 cross-validation over the 33 trials in the at-home training data set. The first hyper-parameter was  
 252 window size for the ECoG spectral estimate,  $w \in \{0.8, 1.2, 1.6, 2.0, 2.4, 2.8, 3.2\}$  measured in  
 253 seconds. Overlapping windows, with a step of 0.4 seconds, resulted in  $N$  windows per trial where  
 254  $N$  varied with window duration  $w$ . As a result of windowing, motor instruction labels were  
 255 aggregated from each sample in the window, where 1 indicates motor intent and 0 indicates rest.  
 256 In order to build a decoding model robust to transitions from a move to rest state, windows with  
 257 data collected during both move and rest states were not removed for training. Three possible  
 258 methods for aggregating windows of labels were considered during cross-validation (Figure **S6**).  
 259 For each window, vector  $\mathbf{y} = \{y^{(1)}, y^{(2)}, y^{(3)}\}$  of labels was computed where

- 260       ○  $y^{(1)} \in \{1, 0\}$  is the last label of the window.
- 261       ○  $y^{(2)} \in \{1, 0\}$  is the majority of labels in the window.
- 262       ○  $y^{(3)} \in \{1, 0, NaN\}$  is 1 or 0 if there is unanimous consensus within the window (all  
 263       1 or all 0), or  $NaN$  if there are both move and rest labels in the window. This  
 264       aggregation is motivated by aiming to provide the decoder with the highest  
 265       quality data.  $NaN$ -labelled windows were not used for supervised learning.

266 For ECoG channels 1 and 3, the PSD of each window was computed using the multitaper method  
 267 in the MNE python package<sup>3</sup> with normalized half-bandwidth  $T = 3$ , and a bandwidth of  $b = \frac{2 \times T}{0.4 \times w}$   
 268 <sup>4</sup>.  $2T - 1 = 5$  tapers were used and an adaptive weighting routine was used to combine estimates  
 269 of different tapers<sup>5</sup>. Spectral power was estimated for a frequency range between 0-100Hz and  
 270 was converted to decibels. Spectral estimation for channels 1 and 3 resulted in  $\mathbf{x}^{(ch\ 1)} \in \mathbb{R}^{F_{psd}}$

271 and  $x^{(ch\ 3)} \in \mathbb{R}^{F_{psd}}$ , respectively and where  $F_{psd}$  is the length of the PSD. For channels 2 and 4,  
 272 median power  $\tilde{x} \in \mathbb{R}_+$  for each window was calculated. Spectral estimates from all channels were  
 273 aggregated into one spectral feature vector  $\mathbf{x} \in \mathbb{R}^F$  for each window where  $F = 2 \times F_{psd} + 2$

## 274 At-Home Decoder Architecture

275 Three decoding model architectures were considered during cross-validation. Each decoding  
 276 model used a fixed window length and labeling method.

### 277 Hidden Markov Model decoder

278 In order to incorporate the temporal dynamics of switching between move and rest states, we  
 279 used a Hidden Markov Model, a state-space model that has been used to describe time series  
 280 data in a wide variety of fields<sup>6</sup>. It assumes an  $M$ -state system has  $\{q_0, q_1, \dots, q_{M-1}\}$  discrete latent  
 281 states which evolve over time, driven by a first-order, ergodic Markov chain resulting in a  
 282 sequence of  $N$  states  $Z = (z_0, z_1, \dots, z_{N-1})$ . Observations of the system ( $\mathbf{x}_n$ ) are distributed  
 283 according to state-specific Gaussian emission distributions  $\mathbf{B} = \{\mathbf{b}_m\}$  where  $\mathbf{b}_m \sim \mathcal{N}(\boldsymbol{\mu}_m, \boldsymbol{\Sigma}_m)$  for  
 284 each state  $q_m$  with mean  $\boldsymbol{\mu}_m$  and covariance  $\boldsymbol{\Sigma}_m$ , which was constrained to be diagonal so that  
 285 training would be more computationally tractable. The Markov chain transition matrix is  $A = \{a_{ij}\}$   
 286 where  $a_{ij} = Pr(z_{n+1} = q_j | z_n = q_i)$ . The initial state of the system is drawn from the discrete initial  
 287 state distribution  $\boldsymbol{\pi}$ . The entire HMM is fully parameterized by  $\lambda = (A, \mathbf{B}, \boldsymbol{\pi})$ . In the model system,  
 288 the state of the system at each discrete time  $n$  is based on the Markov chain transition  
 289 probabilities and an observed feature is generated according to current state  $z_n$  resulting in a  
 290 sequence of observations  $\mathbf{X} = (\mathbf{x}_0, \mathbf{x}_1, \dots, \mathbf{x}_{N-1})$ .<sup>6,7</sup>

291 Each HMM was trained with the Baum-Welch algorithm with random parameter initialization and  
 292 a maximum of 10 iterations using the hmmlearn python package<sup>8</sup>. For prediction of latent state,  
 293 the forward algorithm was used in order to estimate the probability of being in each state at each  
 294 time  $n$ . The normalized forward algorithm computes the probability of being in each latent state

295  $q_i$ , at time  $n$ , and is defined as  $\alpha_n(q_i) = Pr(z_n = q_i | x_0, \dots, x_n, \lambda) = \hat{x}^{(i)}$  resulting in  $\hat{\mathbf{x}}_n \in [0,1]^M$   
 296 where  $M$  is the number of HMM states and  $\sum_{i=1}^M \hat{x}^{(i)} = 1$ . We let the number of states in the HMM  
 297 vary with  $M \in \{3,5,7\}$  because although our target was binary, a number of different states could  
 298 be reflected in the neural signal related to different aspects hand grasp initiation and termination.  
 299  $M$  was selected in cross-validation (Figure S6, Table S5)

300 Logistic regression (LR) is used to map HMM state probabilities  $\hat{\mathbf{x}}_n$  to binary move/rest targets.  
 301 For each window beginning at time point  $n$  that did not have a *NaN* label, the feature vector is  
 302 accompanied by a label  $y_n \in \{0,1\}$  indicating whether the window corresponds with rest (0) or  
 303 motor intent (1). *NaN* labeled windows were dropped for fitting LR parameters. A LR model is  
 304 parameterized by a vector  $\boldsymbol{\beta} \in \mathbb{R}^{M+1} = [\beta_0, \beta_1, \dots, \beta_M]^T$ . For a given parameterization  $\boldsymbol{\beta}$ , the LR  
 305 estimated likelihoods of motor intent for window starting at time point  $n$  are given by:

$$306 \quad Pr(\text{Motor Intent} | \hat{\mathbf{x}}_n; \boldsymbol{\beta}) = \frac{\exp \boldsymbol{\beta}^T \tilde{\mathbf{x}}_n}{1 + \exp \boldsymbol{\beta}^T \tilde{\mathbf{x}}_n}$$

$$307 \quad Pr(\text{Rest} | \hat{\mathbf{x}}_n; \boldsymbol{\beta}) = \frac{1}{1 + \exp \boldsymbol{\beta}^T \tilde{\mathbf{x}}_n}$$

308 Where  $\tilde{\mathbf{x}}_n = [1, \hat{\mathbf{x}}_n]^T$  is the HMM state probability vector with a one prepended, enabling  $\beta_0$  to  
 309 serve as a constant offset. Thus, fitting an LR model entails finding the parameters that maximize  
 310 the elastic net regularized log-likelihood of the labels corresponding to the training data:

$$311 \quad \hat{\boldsymbol{\beta}} = \underset{\boldsymbol{\beta}}{\operatorname{argmin}} \frac{1-\rho}{2} \|\boldsymbol{\beta}\|_2^2 + \|\boldsymbol{\beta}\|_1 + \sum_{n=1}^N -\log \Pr(y_n | \mathbf{x}_n; \boldsymbol{\beta})$$

312 Where  $\|\boldsymbol{\beta}\|_2^2 = \boldsymbol{\beta}^T \boldsymbol{\beta}$  and  $\rho = 0.5$ . The LR parameter vector  $\hat{\boldsymbol{\beta}}$  was computed using scikit-learn  
 313 with elasticnet regularization and the SAGA solver.<sup>8</sup>

## Linear Discriminant Analysis Decoder

The second decoding model architecture was a Linear Discriminant Analysis (LDA) decoder. Since the observations to the HMM decoder were the derived spectral features, the latent states fitted by the HMM are not guaranteed to be related to motor intent. LDA is a supervised classification technique that separates groups of labelled data by maximizing the ratio of between-class to within-class separability.<sup>9</sup> This yields a *linear discriminant* vector which maximally separates the two classes.

First, the training data  $\mathbf{X} \in \mathbb{R}^{F \times N}$  were divided by motor intent label into the subset  $\mathbf{X}^{(0)} \in \mathbb{R}^{F \times N_0}$  for data labelled as a rest state,  $\mathbf{X}^{(1)} \in \mathbb{R}^{F \times N_1}$  for data labeled as a move state, and  $\mathbf{X}^{(NaN)} \in \mathbb{R}^{F \times N_{NaN}}$  for data without a label (see Windowing).  $\mathbf{X}^{(NaN)}$  was not used for parameter fitting as LDA is a supervised learning method which necessitates labelled data. For  $j \in \{0,1\}$  and  $N^* = N_0 + N_1$ , let  $\boldsymbol{\mu}_j$  be the sample mean of  $\mathbf{X}^{(j)}$  and define the *scatter matrix* as the unnormalized sample covariance matrix  $\mathbf{M}_j = \sum_{n \in N^*} \left( (\mathbf{x}_n^{(j)} - \boldsymbol{\mu}_j) (\mathbf{x}_n^{(j)} - \boldsymbol{\mu}_j)^T \right)$ . *Within-class* scatter matrix is defined as  $\mathbf{M}_W = \mathbf{M}_0 + \mathbf{M}_1$  and the *between-class* scatter matrix was defined as  $\mathbf{M}_B = (\boldsymbol{\mu}_0 - \boldsymbol{\mu}_1)(\boldsymbol{\mu}_0 - \boldsymbol{\mu}_1)^T$ . Thus, the linear discriminant  $\mathbf{v}^* \in \mathbb{R}^F$  is found as the solution to:

$$\mathbf{v}^* = \underset{\mathbf{v}}{\operatorname{argmax}} \frac{\mathbf{v}^T \mathbf{M}_B \mathbf{v}}{\mathbf{v}^T \mathbf{M}_W \mathbf{v}}$$

Which maximizes the variance between classes while minimizing the variance within classes. LDA models were implemented using the scikit-learn Python package.<sup>8</sup>

## LDA-HMM Decoder

The third decoder architecture was a combination of the described LDA and HMM decoders. The LDA parameters were fitted as described above, but rather than using LDA directly for classification, the spectral feature vector  $\mathbf{x}_n$  was used to generate the LDA scores  $\mathbf{x}_n^* = \mathbf{x}_n^T \mathbf{v}^*$  for



every window  $n$ . The sequence of LDA scores  $\mathbf{X}^* = (\mathbf{x}_0^*, \mathbf{x}_1^*, \dots, \mathbf{x}_{N-1}^*)$  was then used as the observations for a 2-state HMM decoder which generated prediction of motor state as described above.

## Lagged decoding

Introducing a time lag in decoding between neural features and the label can contribute to increases in decoder performance in motor BCIs.<sup>10,11</sup> Because packets of data are transmitted every 0.4 seconds from the recording device, the values considered for a lag were multiples of 0.4 seconds. Parameter  $l \in \{0.8, 0.4, 0.0\}$  is the number of seconds feature vector  $\mathbf{x}$  precedes the associated label  $y$ .

## Cross-validation

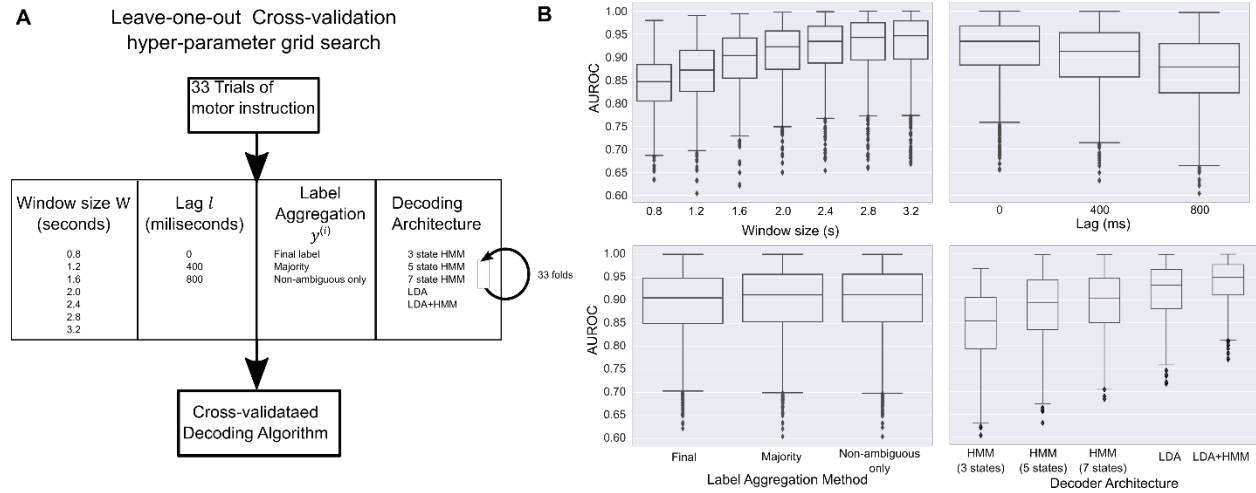

**FIGURE S6 CROSS-VALIDATION OVERVIEW A)** GRID SEARCH FOR LEAVE-ONE-TRIAL-OUT CROSS-VALIDATION DEPICTED FOR 33 TRIALS OF MOTOR INSTRUCTION. SELECTED HYPER-PARAMETERS ARE SUMMARIZED IN TABLE S5. **B)** IMPACT OF EACH HYPER-PARAMETER PLOTTED OVER ALL OTHER HYPER-PARAMETERIZATIONS. WINDOW SIZE, LAG, AND DECODER ARCHITECTURE HAD LARGE IMPACTS ON PERFORMANCE, BUT LABEL AGGREGATION METHOD HAD A SIMILAR DISTRIBUTION OF PERFORMANCE OVER ALL OTHER HYPER-PARAMETERIZATIONS.

In order to select the optimal set of hyper-parameters, we used leave-one-out cross-validation over the 33 trials in the train dataset. The grid search for each parameter was

- **Window size:**  $w \in \{0.8, 1.2, 1.6, 2.0, 2.4, 2.8, 3.2\}$  where  $w$  is the duration in seconds of the window of neural data used for each prediction.

- **Label Scheme:**  $y^{(i)} \in \mathbf{y}$  where  $y$  is one of the three labeling schemes defined above
- **Decoder Architecture:** A total of 5 decoder architectures were considered. Three different HMM decodes were considered, one for each value of  $M \in \{3, 5, 7\}$ . The above-described LDA decoder and LDA-HMM decoder were also considered.
- **Lag:**  $l \in \{0.8, 0.4, 0.0\}$  where  $l$  is seconds between feature vector  $x$  and target label  $y$

We compared cross-validated models using median area under the receiver-operator characteristic curve (AUC) for each fold. In order to compute the AUC for each fold, we chose to use the non-ambiguous labeling scheme  $y^{(3)}$  to bias the hyperparameters for reliability in decoding. Impact of each hyperparameter on performance during cross-validation is summarized in Figure S6B and the set of hyperparameters that were selected can be found in Table S5.

| Hyperparameter             | Selected Value |
|----------------------------|----------------|
| Window size, $w$ (seconds) | 3.2            |
| Label Scheme, $y$          | $y^{(3)}$      |
| Decoder Architecture       | LDA-HMM        |
| Lag $l$ (seconds)          | 0.0            |

**TABLE S5 FINAL DECODER HYPER-PARAMETERS SELECTED VIA LEAVE-ONE-OUT CROSS-VALIDATION**

## Threshold setting

The decoded motor intent was calculated by thresholding the predicted probability of motor intent for the final trained model. The receiver-operator characteristic (ROC) curve was calculated using the training dataset to calculate Youden's J score across different threshold. Youden's J score balances the sensitivity and specificity of the decoder for a specific threshold. The optimal threshold was selected by maximizing Youden's J score, resulting in a value of 0.969.

## Artifact Detection

The Medtronic PC+S recording device included quality control protocols which resulted in periodic electrical artifacts occurring approximately every 10 minutes. When artifacts were detected,

376 decoding was paused for 0.8 seconds until the artifact passed, during which the previously  
377 decoded motor state was maintained.

## 378 Functional Task Accuracy

379 A relative distance score,  $r_i$ , was assigned to each target based on the distance of the object from  
380 the center of the target as shown in Figure 3A. A placement score for the  $i$ th object placement  
381 was computed as

$$382 \quad S_i = \frac{1}{1 + r_i}$$

383 so that a higher score corresponded to objects placed closer to the center of the target. The  
384 functional task was repeated a total of 20 times during each block leading to a maximum score  
385  $S_{t_{MAX}} = 20$  per block. The subject's accuracy was determined then as the sum of all the individual  
386 trial scores,  $S_t$ , divided by maximum block score:

$$387 \quad accuracy = \frac{S_t}{S_{t_{MAX}}} = \frac{\sum_{i=1}^{20} S_i}{S_{t_{MAX}}}$$

388 The subject showed improvement in the mean ( $\pm$  std. error) accuracy of placing a small cup,  
389  $60.1\% \pm 7.8\%$  at week 11 versus  $82.8\% \pm 4.7\%$  at week 19 ( $p=0.03$ ) or a checker ( $64.5\% \pm$   
390  $7.3\%$  at week 13 versus  $88.8\% \pm 4.8\%$  at week 19,  $p=0.03$ ) at the center of a target as  
391 summarized in Figure **3A** and **3B**.

392 Functional improvement was quantified as the reduction in the average time taken to perform  
393 specific components of the JHFT (Figure **3C**). Significant improvements were observed in lifting  
394 small objects, lifting light cans, and lifting heavy cans through orthotic-assisted tasks. Along with  
395 a trend towards improvement in writing speed (32.3s to 26.4s,  $p=0.15$ ), clarity of the handwriting

396 also improved throughout the course of the study (Figure **3D**). Further, pinch force increased from  
397 1lb to 3lb within 10 weeks.

### 398 Phone-based User Application Development

399 A custom-made mobile application was designed allowing the subject to interact with and modify  
400 settings of the BCI. The home screen (Figure **S7A**) displays the currently connected and selected  
401 devices in use by the subject. The application was designed by generalizing devices that could  
402 connect to the system, thus providing a method to select from a list of connected input (Figure  
403 **S7B**) and output (Figure **S7E**) devices. These list views provided links to device-specific settings  
404 such as the decoder threshold linked to incoming data from the Activa PC+S (Figure **S7C**). The  
405 settings also allowed the subject to initiate data collection sessions to assess the accuracy of the  
406 current decoder (Figure **S7D**).

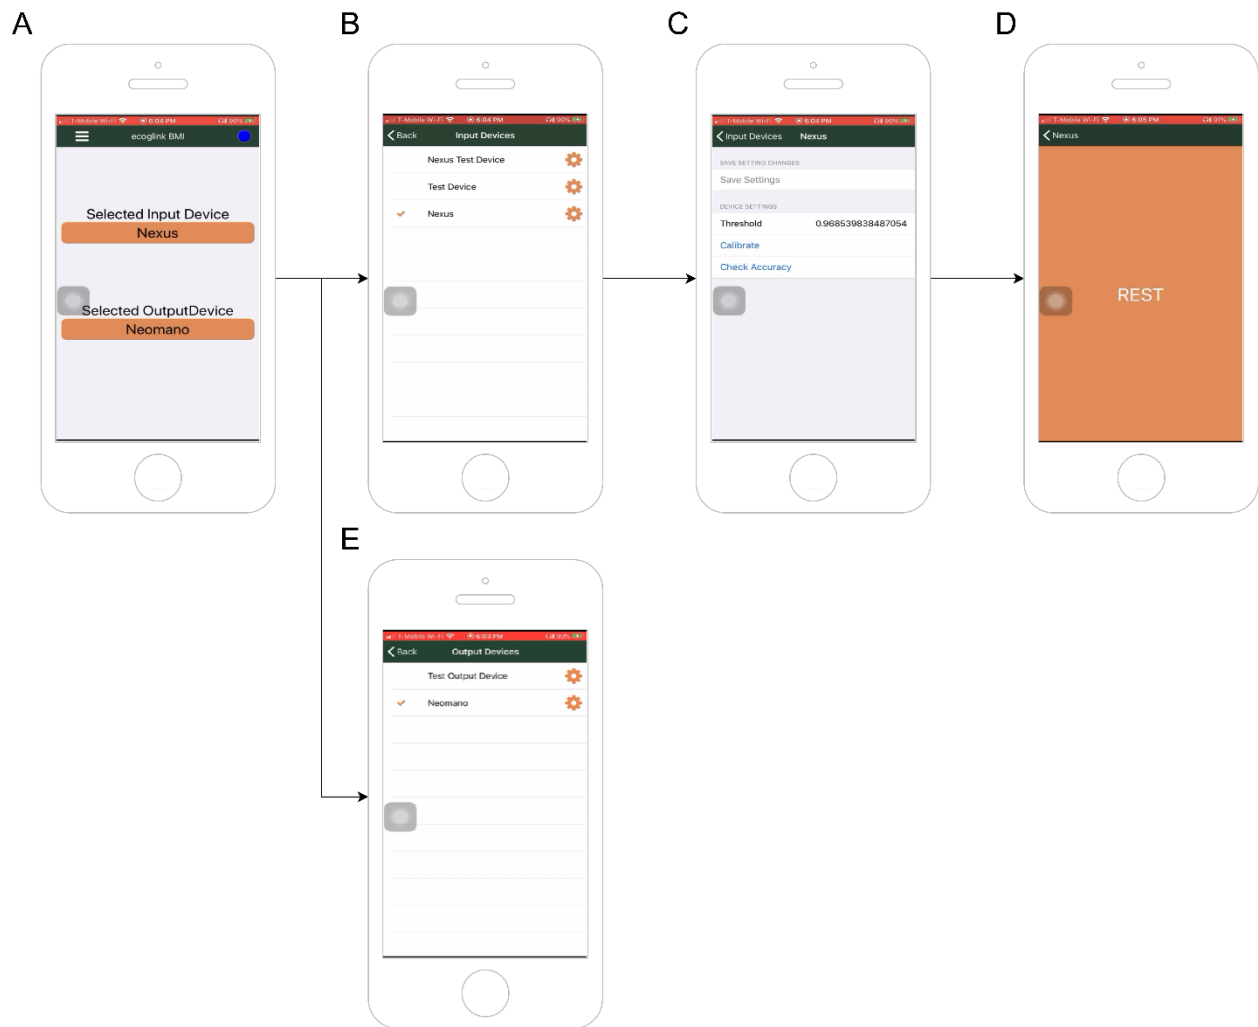

**FIGURE S7** FLOW DIAGRAM OF THE MOBILE APPLICATION USED BY THE SUBJECT FOR AT-HOME INTERACTION AND ADJUSTMENT OF THE BCI

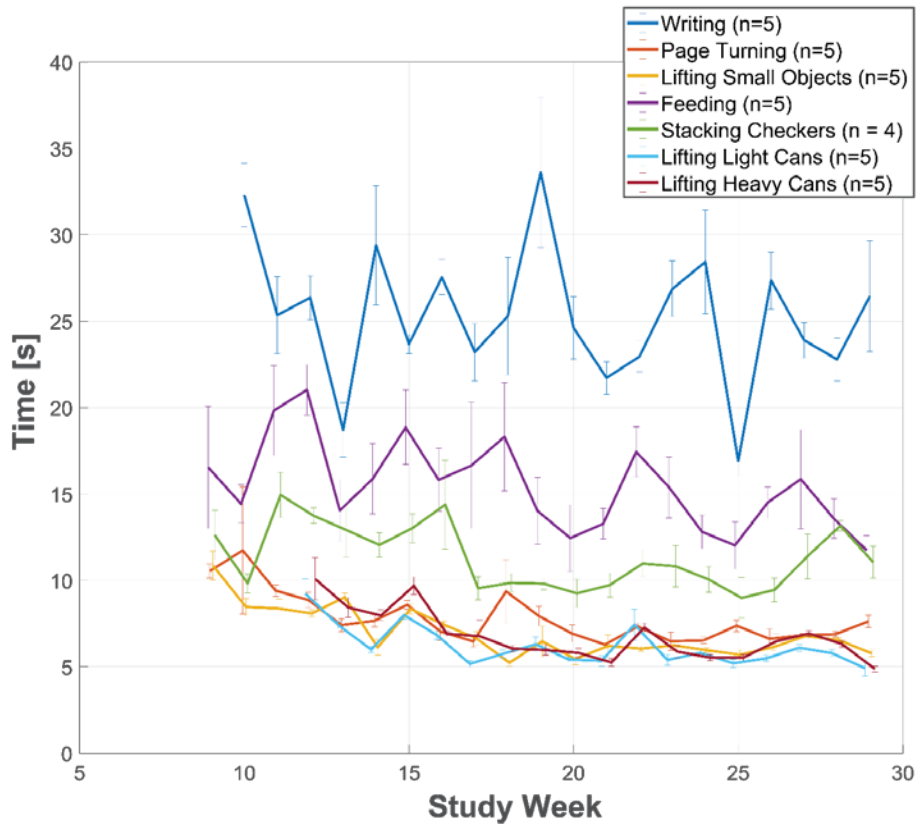

**FIGURE S8 JEBSEN HAND FUNCTION TEST OVER THE STUDY COURSE.** ERROR BARS REPRESENT STANDARD ERROR FROM THE MEAN. FIGURE 3C COMPARES THE FIRST AND LAST SESSIONS.

## Clinical Assessments

The subject underwent weekly interviews to assess for adverse events and was also surveyed for changes in self-perceived functional independence. Changes in health status were assessed with the MOS 36-item short form health survey (SF-36).<sup>12</sup> Perceived changes in functional independence were assessed with the Spinal Cord Independence Measure (SCIM) version III<sup>13</sup> which ranges from 0 to 100 and higher score indicate increased independence. Detailed neurological evaluation for documentation of level and severity of SCI was conducted monthly according to the ISNCSCI.<sup>14</sup>

While there was no change in ISNCSCI ASIA impairment scale from a C5 motor level, there was an unexpected slight increase in the motor zone of partial preservation (defined as the myotomes below the level of injury with residual innervation) on the left from C6 to C8. Additionally, after study week 23, the subject began to be able to extend his right thumb volitionally with motor strength 2/5 in the absence of the FES orthosis. There was no change in the SCIM from a baseline score of 26. The SF-36 indicated a 32.5% improvement in pain, a 5% increase in energy, and an 8% decrease in emotional well-being

Detailed neurological evaluation for documentation of level and severity of SCI was conducted monthly according to the ISNCSCI. Figure S9 and S10 summarize the results of the ISNCSCI obtained during the week 1 and week 29 visits. Diagrams generated using the European Multicenter Study about Spinal Cord Injury (EMSC) ISNCSCI calculator.<sup>15</sup>

443

INTERNATIONAL STANDARDS FOR NEUROLOGICAL CLASSIFICATION OF SPINAL CORD INJURY (ISNCSCI)  
European Multicenter on Human Spinal Cord Injury (EMSCI)  
INTERNAL DYED DERMATOME CHART

Patient Identifier

Examiner Identifier

Comments

Date/Time of Exam

Signature

Comments

Week 1

RIGHT

Light Touch Appreciation

LEFT

2

C2

2

C3

2

C4

1

C5

1

C6

0

C7

0

C8

1

T1

0

T2

0

T3

0

T4

0

T5

0

T6

0

T7

0

T8

0

T9

0

T10

0

T11

0

T12

0

L1

0

L2

0

L3

0

L4

0

L5

0

S1

0

S2

0

S3

0

S4/5

2

C2

2

C3

2

C4

1

C5

0

C6

0

C7

0

C8

1

T1

1

T2

0

T3

0

T4

1

T5

0

T6

0

T7

0

T8

0

T9

0

T10

0

T11

0

T12

0

L1

0

L2

0

L3

0

L4

0

L5

0

S1

0

S2

0

S3

0

S4/5

DAP

No

Grade

0

1

2

NT

Color

RIGHT

Pin Prick Discrimination

LEFT

2

C2

2

C3

2

C4

1

C5

0

C6

0

C7

0

C8

1

T1

1

T2

0

T3

0

T4

0

T5

0

T6

0

T7

0

T8

0

T9

0

T10

0

T11

0

T12

0

L1

0

L2

0

L3

0

L4

0

L5

0

S1

0

S2

0

S3

0

S4/5

2

C2

2

C3

2

C4

1

C5

0

C6

0

C7

0

C8

1

T1

1

T2

0

T3

0

T4

0

T5

0

T6

0

T7

0

T8

0

T9

0

T10

0

T11

0

T12

0

L1

0

L2

0

L3

0

L4

0

L5

0

S1

0

S2

0

S3

0

S4/5

Grade

0

1

2

NT

Color

RIGHT

Manual Muscle Test

LEFT

5

C5

0

C6

0

C7

0

C8

1

T1

0

L2

0

L3

0

L4

0

L5

0

S1

0

5

C5

1

C6

0

C7

0

C8

0

T1

0

L2

0

L3

0

L4

0

L5

0

S1

0

VAC

No

Grade

0

1

2

3

4

5

NT

Color

NEUROLOGICAL LEVELS

SENSORY MOTOR

R

L

C4

C4

C5

C5

NEUROLOGICAL LEVEL OF INJURY (NLI)

C4

COMPLETE OR INCOMPLETE?

Incomplete—Any sensory or motor function in S4/5

CO

A

(in complete injuries only)

ZONE OF PARTIAL PRESERVATION

(most caudal level with any innervations)

R

L

T2

T4

C8

C6

444

445

446

447

448

449

**FIGURE S9 ISNCSCI EXAM ON INITIAL VISIT – STUDY WEEK 1.** NOTE THE C5 MOTOR LEVEL AND C4 NEUROLOGICAL LEVEL OF INJURY (NLI) DUE TO DIMINISHED SENSATION IN THE C5 DISTRIBUTION. THE ZONE OF PARTIAL PRESERVATION FOR THE RIGHT/LEFT IS T2/T4 FOR SENSORY FUNCTION AND C8/C6 FOR MOTOR.

24



| INTERNATIONAL STANDARDS FOR NEUROLOGICAL CLASSIFICATION OF SPINAL CORD INJURY (ISNCSCI) |   |                          |   | Patient Identifier  |   | Date/Time of Exam |   |
|-----------------------------------------------------------------------------------------|---|--------------------------|---|---------------------|---|-------------------|---|
| European Multicenter on Human Spinal Cord Injury (EMSCI)                                |   |                          |   | Examiner Identifier |   | Signature         |   |
| INTERNAL DYED DERMATOME CHART                                                           |   |                          |   | Comments            |   | Comments          |   |
| RIGHT                                                                                   |   | LEFT                     |   | RIGHT               |   | LEFT              |   |
| Light Touch Appreciation                                                                |   | Pin Prick Discrimination |   | Manual Muscle Test  |   |                   |   |
| C2                                                                                      | 2 | C2                       | 2 | C2                  | 2 | C2                | 2 |
| C3                                                                                      | 2 | C3                       | 2 | C3                  | 2 | C3                | 2 |
| C4                                                                                      | 2 | C4                       | 2 | C4                  | 2 | C4                | 2 |
| C5                                                                                      | 1 | C5                       | 1 | C5                  | 0 | C5                | 0 |
| C6                                                                                      | 0 | C6                       | 0 | C6                  | 0 | C6                | 0 |
| C7                                                                                      | 0 | C7                       | 0 | C7                  | 0 | C7                | 0 |
| C8                                                                                      | 0 | C8                       | 0 | C8                  | 0 | C8                | 0 |
| T1                                                                                      | 0 | T1                       | 0 | T1                  | 0 | T1                | 0 |
| T2                                                                                      | 0 | T2                       | 0 | T2                  | 0 | T2                | 0 |
| T3                                                                                      | 0 | T3                       | 0 | T3                  | 0 | T3                | 0 |
| T4                                                                                      | 0 | T4                       | 0 | T4                  | 0 | T4                | 0 |
| T5                                                                                      | 0 | T5                       | 0 | T5                  | 0 | T5                | 0 |
| T6                                                                                      | 0 | T6                       | 0 | T6                  | 0 | T6                | 0 |
| T7                                                                                      | 0 | T7                       | 0 | T7                  | 0 | T7                | 0 |
| T8                                                                                      | 0 | T8                       | 0 | T8                  | 0 | T8                | 0 |
| T9                                                                                      | 0 | T9                       | 0 | T9                  | 0 | T9                | 0 |
| T10                                                                                     | 0 | T10                      | 0 | T10                 | 0 | T10               | 0 |
| T11                                                                                     | 0 | T11                      | 0 | T11                 | 0 | T11               | 0 |
| T12                                                                                     | 0 | T12                      | 0 | T12                 | 0 | T12               | 0 |
| L1                                                                                      | 0 | L1                       | 0 | L1                  | 0 | L1                | 0 |
| L2                                                                                      | 0 | L2                       | 0 | L2                  | 0 | L2                | 0 |
| L3                                                                                      | 0 | L3                       | 0 | L3                  | 0 | L3                | 0 |
| L4                                                                                      | 0 | L4                       | 0 | L4                  | 0 | L4                | 0 |
| L5                                                                                      | 0 | L5                       | 0 | L5                  | 0 | L5                | 0 |
| S1                                                                                      | 0 | S1                       | 0 | S1                  | 0 | S1                | 0 |
| S2                                                                                      | 0 | S2                       | 0 | S2                  | 0 | S2                | 0 |
| S3                                                                                      | 0 | S3                       | 0 | S3                  | 0 | S3                | 0 |
| S4/5                                                                                    | 0 | S4/5                     | 0 | S4/5                | 0 | S4/5              | 0 |

  

| NEUROLOGICAL LEVELS |   | SENSORY MOTOR |    | NEUROLOGICAL LEVEL OF INJURY (NLI) |    | COMPLETE OR INCOMPLETE? |   | ASIA IMPAIRMENT SCALE (AIS) |    | (in complete injuries only) ZONE OF PARTIAL PRESERVATION (most caudal level with any innervations) |    | SENSORY MOTOR |  |
|---------------------|---|---------------|----|------------------------------------|----|-------------------------|---|-----------------------------|----|----------------------------------------------------------------------------------------------------|----|---------------|--|
| R                   | L | C4            | C4 | C4                                 | C4 | CO                      | A | C5                          | T4 | C8                                                                                                 | C8 |               |  |
|                     |   |               |    |                                    |    |                         |   |                             |    |                                                                                                    |    |               |  |

**FIGURE S10 ISNCSCI EXAM ON FINAL VISIT – WEEK 29.** NOTE THAT WHILE THE MOTOR LEVEL REMAINS C5 AND THE NLI C4, THERE IS A SLIGHT INCREASED ZONE OF PARTIAL PRESERVATION WITH IS NOW C8 BILATERALLY COMPARE TO C8 ON THE RIGHT AND C6 ON THE LEFT DURING WEEK ONE. ADDITIONALLY, THE SUBJECT GAINED THE ABILITY TO SLOWLY EXTEND HIS THUMB ON COMMAND ON THE RIGHT SIDE WHICH IS NOTED AS THE MOST CAUDAL INNERVATED NON-KEY MUSCLE AS C8 ON THE RIGHT PANEL.

Changes in health status were assessed with the MOS 36-item short form health survey (SF-36).<sup>12</sup> Comparisons of SF-36 scores between initial and final study visit are summarized in Table S5. Perceived changes in functional independence were assessed with the Spinal Cord Independence Measure (SCIM)<sup>13</sup> version III which ranges from 0 to 100 and higher score indicate increased independence. Changes in SCIM are summarized in Table S6.

There was an 8% decrease in emotional well-being in the SF36 changes in responses to the following questions:

- 1) "During the past 4 weeks, have you been a happy person?" changing from "all of the time" to "most of the time."

2) “During the past 4 weeks, have you felt calm and peaceful?” changing from “all of the time” to most of the time.”

The 32.5% improvement in the pain score was driven by changes in responses to the following questions:

1) “How much bodily pain have you had in the past 4 weeks?” changing from “mild” to “very mild.”

2) “During the past 4 weeks, how much did pain interfere with your normal work?” – change from “moderately” to “a little bit.”

The 5% improvement in energy/fatigue was driven by the response to the question “During the last 4 weeks, did you feel worn out?” changing from “a little bit of the time” to “none of the time.”

**TABLE S6 SF36 SCORES CHANGES. SCORES CALCULATED USING <sup>12,16</sup>**

| Category                                   | Laboratory Trials |             |        | Home Trials   |             |        |
|--------------------------------------------|-------------------|-------------|--------|---------------|-------------|--------|
|                                            | Initial Visit     | Final Visit | Change | Initial Visit | Final Visit | Change |
| Physical Functioning                       | 0%                | 0%          | 0%     | 0%            | 0%          | 0%     |
| Role Limitations Due to Physical Health    | 100%              | 100%        | 0%     | 100%          | 100%        | 0%     |
| Role Limitations Due to Emotional Problems | 100%              | 100%        | 0%     | 100%          | 100%        | 0%     |
| Energy/Fatigue                             | 80%               | 85%         | 5%     | 90%           | 90%         | 0%     |
| Emotional Well-Being                       | 100%              | 92%         | -8%    | 92%           | 92%         | 0%     |
| Social Functioning                         | 100%              | 100%        | 0%     | 100%          | 100%        | 0%     |
| Pain                                       | 67.5%             | 100%        | 32.5%  | 100%          | 77.5%       | -22.5% |
| General Health                             | 85%               | 85%         | 0%     | 85%           | 90%         | 5%     |
| Health Change                              | 75%               | 75%         | 0%     | 75%           | 75%         | 0%     |

**TABLE S7 SPINAL CORD INDEPENDENCE MEASURE.**

|                                      | Laboratory Trials |             |        | Home trials   |             |        |
|--------------------------------------|-------------------|-------------|--------|---------------|-------------|--------|
|                                      | Initial Visit     | Final Visit | Change | Initial Visit | Final Visit | Change |
| Self-Care                            | 2                 | 2           | 0      | 2             | 3           | 1      |
| Respiration and Sphincter Management | 21                | 21          | 0      | 21            | 21          | 0      |
| Mobility                             | 3                 | 3           | 0      | 3             | 3           | 0      |
| Total                                | 26                | 26          | 0      | 26            | 27          | 1      |

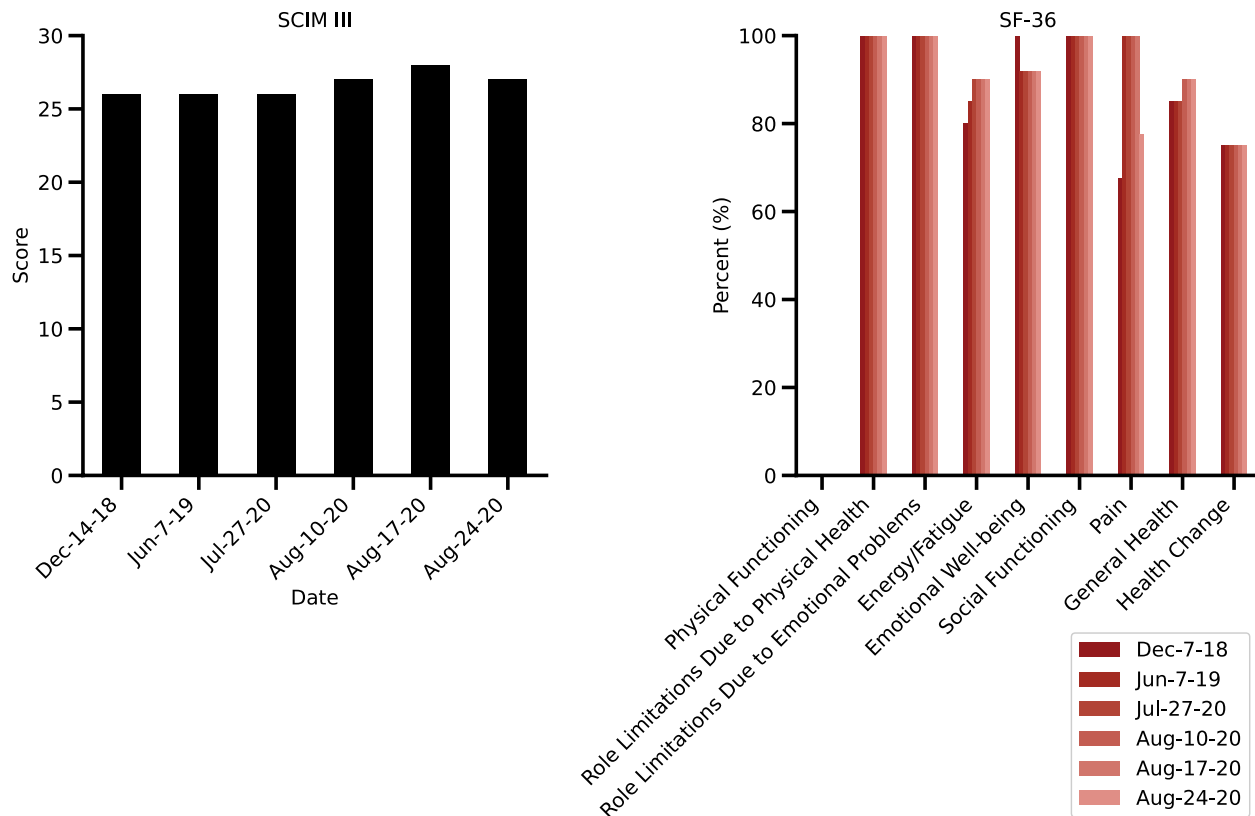

**FIGURE S11 SCIM III AND SF-36.** CHANGES IN SCORES FOR THE SCIM III (LEFT) AND SF-36 (RIGHT) OVER THE COURSE OF THE STUDY PERIOD. THE FIRST TWO TIME POINTS WERE TAKEN BEFORE AND AFTER THE LABORATORY STUDY PERIOD. THE FINAL 4 TIME POINTS WERE TAKEN THROUGHOUT THE STUDY AT HOME.

## References

- Gant K, Guerra S, Zimmerman L, Parks BA, Prins NW, Prasad A. EEG-controlled functional electrical stimulation for hand opening and closing in chronic complete cervical spinal cord injury. *Biomedical Physics & Engineering Express* 2018;4:065005.
- Tshitoyan V. Simple Neural Network. 1.1 ed. GitHub: GitHub; 2019.
- Gramfort A, Luessi M, Larson E, et al. MEG and EEG data analysis with MNE-Python. *Front Neurosci* 2013;7:267.
- Babadi B, Brown EN. A review of multitaper spectral analysis. *IEEE Trans Biomed Eng* 2014;61:1555-64.
- Thomson DJ. Spectrum estimation and harmonic analysis. *Proceedings of the IEEE* 1982;70:1055-96.
- Bishop CM. Pattern recognition and machine learning. New York: Springer; 2006.
- Rabiner LR. A Tutorial on Hidden Markov-Models and Selected Applications in Speech Recognition. *Proceedings of the IEEE* 1989;77:257-86.
- Pedregosa F, Varoquaux G, Gramfort A, et al. Scikit-learn: Machine Learning in Python. *J Mach Learn Res* 2011;12:2825-30.
- Tharwat A, Gaber T, Ibrahim A, Hassanien AE. Linear discriminant analysis: A detailed tutorial. *Ai Communications* 2017;30:169-90.

10. Carmena JM, Lebedev MA, Crist RE, et al. Learning to control a brain-machine interface for reaching and grasping by primates. *PLoS Biol* 2003;1:E42.
11. Presacco A, Goodman R, Forrester L, Contreras-Vidal JL. Neural decoding of treadmill walking from noninvasive electroencephalographic signals. *J Neurophysiol* 2011;106:1875-87.
12. Ware JE, Jr., Sherbourne CD. The MOS 36-item short-form health survey (SF-36). I. Conceptual framework and item selection. *Med Care* 1992;30:473-83.
13. Itzkovich M, Gelernter I, Biering-Sorensen F, et al. The Spinal Cord Independence Measure (SCIM) version III: reliability and validity in a multi-center international study. *Disabil Rehabil* 2007;29:1926-33.
14. Kirshblum SC, Burns SP, Biering-Sorensen F, et al. International standards for neurological classification of spinal cord injury (revised 2011). *J Spinal Cord Med* 2011;34:535-46.
15. ISNCSCI Calculator. European Multicenter Study about Spinal Cord Injury, 2019. (Accessed 06/18/2019, 2019, at <http://ais.emsci.org/>.)
16. Free online SF-36 score calculator. OrthoToolKit, 2019. (Accessed 7/2/2019, 2019, at <https://www.orthotoolkit.com/sf-36/>.)
